# Supplementary material for: Effects of waste stream combinations from brewing industry on performance of Black Soldier Fly, Hermetia illucens (Diptera: Stratiomyidae)
Source: PeerJ. 2018 Nov 28;6:e5885. doi: 10.7717/peerj.5885 (PMC6272031; doi:10.7717/peerj.5885)
Supplement: Supplemental Information 1 [file peerj-06-5885-s001.xlsx]

## Sheet: Sheet1
RAW DATA_Adult longevity for Female Hermetia illucens
Condition	diet	Replicate	Days
Unfed	MCW	1	6
Unfed	MCW	2	5
Unfed	MCW	3	4
Unfed	MCW	4	5
Unfed	MCW	5	6
Unfed	MBW	1	3
Unfed	MBW	2	1
Unfed	MBW	3	5
Unfed	MBW	4	6
Unfed	MBW	5	4
Unfed	MBW	6	5
Unfed	MBW	7	8
Unfed	SBW	1	6
Unfed	SBW	2	5
Unfed	SBW	3	5
Unfed	SBW	4	2
Unfed	SBW	5	1
Unfed	SBW	6	2
Unfed	SBW	7	3
Unfed	SBW	8	4
Unfed	SBW	9	3
Unfed	SBW	10	2
Unfed	SBW	11	5
Unfed	SBW	12	7
Unfed	BW	1	5
Unfed	BW	2	4
Unfed	BW	3	6
Unfed	BW	4	5
Unfed	BW	5	7
Unfed	BW	6	7
Unfed	MCY	1	2
Unfed	MCY	2	2
Unfed	MCY	3	2
Unfed	MCY	4	6
Unfed	MCY	5	5
Unfed	MCY	6	6
Unfed	MCY	7	3
Unfed	MCY	8	4
Unfed	MCY	9	5
Unfed	MCY	10	7
Unfed	MCY	11	9
Unfed	MCY	12	7
Unfed	MCY	13	10
Unfed	MBY	1	1
Unfed	MBY	2	1
Unfed	MBY	3	3
Unfed	MBY	4	4
Unfed	MBY	5	2
Unfed	MBY	6	6
Unfed	MBY	7	3
Unfed	MBY	8	7
Unfed	MBY	9	4
Unfed	MBY	10	5
Unfed	MBY	11	5
Unfed	MBY	12	7
Unfed	SBY	1	3
Unfed	SBY	2	4
Unfed	SBY	3	5
Unfed	SBY	4	6
Unfed	SBY	5	5
Unfed	SBY	6	7
Unfed	SBY	7	6
Unfed	SBY	8	8
Unfed	SBY	9	8
Unfed	SBY	10	7
Unfed	SBY	11	8
Unfed	BY	1	3
Unfed	BY	2	1
Unfed	BY	3	4
Unfed	BY	4	5
Unfed	BY	5	3
Unfed	BY	6	6
Unfed	BY	7	7
Unfed	BY	8	7
Unfed	BY	9	7
Unfed	BY	10	8
Unfed	BY	11	7
Unfed	BY	12	8
Unfed	BY	13	9
Unfed	BY	14	10
Unfed	MCYMo	1	2
Unfed	MCYMo	2	5
Unfed	MCYMo	3	4
Unfed	MCYMo	4	3
Unfed	MCYMo	5	4
Unfed	MCYMo	6	5
Unfed	MCYMo	7	3
Unfed	MCYMo	8	4
Unfed	MCYMo	9	4
Unfed	MCYMo	10	8
Unfed	MCYMo	11	5
Unfed	MCYMo	12	7
Unfed	MCYMo	13	6
Unfed	MCYMo	14	8
Unfed	MBYMo	1	1
Unfed	MBYMo	2	2
Unfed	MBYMo	3	3
Unfed	MBYMo	4	5
Unfed	MBYMo	5	3
Unfed	MBYMo	6	4
Unfed	MBYMo	7	4
Unfed	MBYMo	8	6
Unfed	MBYMo	9	5
Unfed	MBYMo	10	6
Unfed	MBYMo	11	7
Unfed	MBYMo	12	7
Unfed	MBYMo	13	8
Unfed	MBYMo	14	9
Unfed	SBYMo	1	2
Unfed	SBYMo	2	3
Unfed	SBYMo	3	3
Unfed	SBYMo	4	2
Unfed	SBYMo	5	6
Unfed	SBYMo	6	4
Unfed	SBYMo	7	5
Unfed	BYMo	1	2
Unfed	BYMo	2	1
Unfed	BYMo	3	5
Unfed	BYMo	4	3
Unfed	BYMo	5	3
Unfed	BYMo	6	7
Unfed	BYMo	7	5
Unfed	BYMo	8	3
Unfed	BYMo	9	6
Unfed	BYMo	10	4
Unfed	BYMo	11	6
Unfed	BYMo	12	7
Unfed	BYMo	13	5
Unfed	BYMo	14	7
Water	MCW	1	3
Water	MCW	2	5
Water	MCW	3	6
Water	MCW	4	9
Water	MCW	5	13
Water	MCW	6	14
Water	MCW	7	16
Water	MCW	8	18
Water	MCW	9	17
Water	MCW	10	19
Water	MBW	1	3
Water	MBW	2	4
Water	MBW	3	5
Water	MBW	4	7
Water	MBW	5	8
Water	MBW	6	8
Water	MBW	7	9
Water	MBW	8	11
Water	MBW	9	12
Water	MBW	10	13
Water	MBW	11	15
Water	MBW	12	24
Water	SBW	1	2
Water	SBW	2	8
Water	SBW	3	2
Water	SBW	4	3
Water	SBW	5	5
Water	SBW	6	6
Water	SBW	7	7
Water	SBW	8	8
Water	SBW	9	9
Water	SBW	10	13
Water	SBW	11	15
Water	SBW	12	20
Water	BW	1	3
Water	BW	2	4
Water	BW	3	5
Water	BW	4	6
Water	BW	5	7
Water	BW	6	8
Water	BW	7	10
Water	BW	8	11
Water	BW	9	13
Water	BW	10	14
Water	BW	11	17
Water	MCY	1	2
Water	MCY	2	3
Water	MCY	3	2
Water	MCY	4	5
Water	MCY	5	4
Water	MCY	6	6
Water	MCY	7	7
Water	MCY	8	7
Water	MCY	9	10
Water	MCY	10	16
Water	MCY	11	15
Water	MCY	12	17
Water	MCY	13	20
Water	MCY	14	21
Water	MCY	15	22
Water	MCY	16	23
Water	MCY	17	22
Water	MCY	18	25
Water	MBY	1	1
Water	MBY	2	3
Water	MBY	3	5
Water	MBY	4	4
Water	MBY	5	5
Water	MBY	6	6
Water	MBY	7	7
Water	MBY	8	8
Water	MBY	9	10
Water	MBY	10	8
Water	MBY	11	9
Water	MBY	12	14
Water	MBY	13	14
Water	MBY	14	16
Water	MBY	15	19
Water	MBY	16	21
Water	SBY	1	4
Water	SBY	2	5
Water	SBY	3	6
Water	SBY	4	7
Water	SBY	5	9
Water	SBY	6	6
Water	SBY	7	10
Water	SBY	8	14
Water	SBY	9	18
Water	BY	1	1
Water	BY	2	2
Water	BY	3	2
Water	BY	4	3
Water	BY	5	3
Water	BY	6	2
Water	BY	7	4
Water	BY	8	4
Water	BY	9	6
Water	BY	10	10
Water	BY	11	11
Water	BY	12	17
Water	BY	13	16
Water	BY	14	15
Water	BY	15	21
Water	BY	16	22
Water	MCYMo	1	2
Water	MCYMo	2	3
Water	MCYMo	3	7
Water	MCYMo	4	8
Water	MCYMo	5	7
Water	MCYMo	6	9
Water	MCYMo	7	9
Water	MCYMo	8	12
Water	MCYMo	9	13
Water	MCYMo	10	15
Water	MCYMo	11	14
Water	MCYMo	12	16
Water	MCYMo	13	20
Water	MCYMo	14	21
Water	MCYMo	15	26
Water	MBYMo	1	1
Water	MBYMo	2	2
Water	MBYMo	3	4
Water	MBYMo	4	6
Water	MBYMo	5	9
Water	MBYMo	6	10
Water	MBYMo	7	9
Water	MBYMo	8	10
Water	MBYMo	9	15
Water	MBYMo	10	18
Water	MBYMo	11	27
Water	MBYMo	12	21
Water	MBYMo	13	22
Water	MBYMo	14	20
Water	MBYMo	15	21
Water	SBYMo	1	3
Water	SBYMo	2	7
Water	SBYMo	3	4
Water	SBYMo	4	6
Water	SBYMo	5	7
Water	SBYMo	6	9
Water	SBYMo	7	12
Water	SBYMo	8	12
Water	SBYMo	9	13
Water	SBYMo	10	14
Water	SBYMo	11	18
Water	SBYMo	12	17
Water	SBYMo	13	20
Water	SBYMo	14	23
Sugar	MCW	1	18
Sugar	MCW	2	14
Sugar	MCW	3	12
Sugar	MCW	4	12
Sugar	MCW	5	11
Sugar	MCW	6	23
Sugar	MCW	7	11
Sugar	MCW	8	12
Sugar	MCW	9	15
Sugar	MCW	10	17
Sugar	MCW	11	11
Sugar	MCW	12	11
Sugar	MCW	13	12
Sugar	MCW	14	29
Sugar	MCW	15	12
Sugar	MCW	16	13
Sugar	MCW	17	14
Sugar	MCW	18	32
Sugar	MCW	19	24
Sugar	MCW	20	17
Sugar	MBW	1	8
Sugar	MBW	2	10
Sugar	MBW	3	8
Sugar	MBW	4	12
Sugar	MBW	5	21
Sugar	MBW	6	22
Sugar	MBW	7	7
Sugar	MBW	8	11
Sugar	MBW	9	32
Sugar	MBW	10	11
Sugar	MBW	11	9
Sugar	MBW	12	12
Sugar	MBW	13	11
Sugar	MBW	14	10
Sugar	MBW	15	15
Sugar	MBW	16	13
Sugar	MBW	17	21
Sugar	MBW	18	14
Sugar	MBW	19	16
Sugar	MBW	20	19
Sugar	SBW	1	17
Sugar	SBW	2	16
Sugar	SBW	3	10
Sugar	SBW	4	12
Sugar	SBW	5	14
Sugar	SBW	6	18
Sugar	SBW	7	15
Sugar	SBW	8	11
Sugar	SBW	9	16
Sugar	SBW	10	9
Sugar	SBW	11	10
Sugar	SBW	12	10
Sugar	SBW	13	16
Sugar	SBW	14	11
Sugar	SBW	15	13
Sugar	SBW	16	15
Sugar	SBW	17	23
Sugar	SBW	18	30
Sugar	SBW	19	32
Sugar	BW	1	9
Sugar	BW	2	15
Sugar	BW	3	12
Sugar	BW	4	8
Sugar	BW	5	9
Sugar	BW	6	16
Sugar	BW	7	13
Sugar	BW	8	11
Sugar	BW	9	10
Sugar	BW	10	12
Sugar	BW	11	10
Sugar	BW	12	9
Sugar	BW	13	13
Sugar	BW	14	14
Sugar	BW	15	9
Sugar	BW	16	13
Sugar	BW	17	18
Sugar	BW	18	15
Sugar	BW	19	19
Sugar	MCY	1	8
Sugar	MCY	2	14
Sugar	MCY	3	16
Sugar	MCY	4	13
Sugar	MCY	5	20
Sugar	MCY	6	15
Sugar	MCY	7	21
Sugar	MCY	8	9
Sugar	MCY	9	28
Sugar	MCY	10	16
Sugar	MCY	11	32
Sugar	MCY	12	14
Sugar	MCY	13	11
Sugar	MCY	14	9
Sugar	MCY	15	10
Sugar	MCY	16	12
Sugar	MCY	17	11
Sugar	MCY	18	13
Sugar	MBY	1	10
Sugar	MBY	2	11
Sugar	MBY	3	11
Sugar	MBY	4	14
Sugar	MBY	5	16
Sugar	MBY	6	16
Sugar	MBY	7	13
Sugar	MBY	8	19
Sugar	MBY	9	11
Sugar	MBY	10	10
Sugar	SBY	1	18
Sugar	SBY	2	14
Sugar	SBY	3	20
Sugar	SBY	4	17
Sugar	SBY	5	12
Sugar	SBY	6	14
Sugar	BY	1	13
Sugar	BY	2	16
Sugar	BY	3	13
Sugar	BY	4	14
Sugar	BY	5	16
Sugar	BY	6	16
Sugar	BY	7	24
Sugar	BY	8	11
Sugar	BY	9	27
Sugar	BY	10	17
Sugar	MCYMo	1	8
Sugar	MCYMo	2	9
Sugar	MCYMo	3	11
Sugar	MCYMo	4	12
Sugar	MCYMo	5	10
Sugar	MCYMo	6	11
Sugar	MCYMo	7	13
Sugar	MCYMo	8	10
Sugar	MCYMo	9	12
Sugar	MCYMo	10	13
Sugar	MCYMo	11	15
Sugar	MCYMo	12	16
Sugar	MCYMo	13	17
Sugar	MCYMo	14	11
Sugar	MCYMo	15	23
Sugar	MBYMo	1	9
Sugar	MBYMo	2	8
Sugar	MBYMo	3	10
Sugar	MBYMo	4	9
Sugar	MBYMo	5	10
Sugar	MBYMo	6	18
Sugar	MBYMo	7	14
Sugar	MBYMo	8	10
Sugar	MBYMo	9	11
Sugar	MBYMo	10	10
Sugar	MBYMo	11	13
Sugar	MBYMo	12	18
Sugar	MBYMo	13	13
Sugar	MBYMo	14	16
Sugar	MBYMo	15	8
Sugar	MBYMo	16	18
Sugar	MBYMo	17	14
Sugar	MBYMo	18	17
Sugar	MBYMo	19	28
Sugar	MBYMo	20	23
Sugar	SBYMo	1	11
Sugar	SBYMo	2	10
Sugar	SBYMo	3	9
Sugar	SBYMo	4	10
Sugar	SBYMo	5	15
Sugar	SBYMo	6	9
Sugar	SBYMo	7	13
Sugar	SBYMo	8	21
Sugar	SBYMo	9	15
Sugar	SBYMo	10	17
Sugar	SBYMo	11	10
Sugar	SBYMo	12	22
Sugar	SBYMo	13	19
Sugar	SBYMo	14	21
Sugar	SBYMo	15	24
Sugar	BYMo	1	7
Sugar	BYMo	2	7
Sugar	BYMo	3	10
Sugar	BYMo	4	11
Sugar	BYMo	5	10
Sugar	BYMo	6	13
Sugar	BYMo	7	25
Sugar	BYMo	8	15
Sugar	BYMo	9	14
Sugar	BYMo	10	15
Sugar	BYMo	11	18
Sugar	BYMo	12	20
Sugar	BYMo	13	15
Sugar	BYMo	14	10
Sugar	BYMo	15	15
