# Supplementary material for: Effects of waste stream combinations from brewing industry on performance of Black Soldier Fly, Hermetia illucens (Diptera: Stratiomyidae)
Source: PeerJ. 2018 Nov 28;6:e5885. doi: 10.7717/peerj.5885 (PMC6272031; doi:10.7717/peerj.5885)
Supplement: Supplemental Information 3 [file peerj-06-5885-s003.xlsx]

## Sheet: Sheet1
RAW DATA_Nutrient composition of experimental diets
Diet	replicate	CP	CF	ASH	DM	ENERGY	MOISTURE	TCARBO
MCY	1	27.2595	5.74117	5.51438	89.8551	4.227	10.1449	51.3401
MCY	2	27.9203	6.18396	4.69064	90.1961	4.312	9.80392	51.4012
MCY	3	27.9923	6.18396	5.21739	90.1961	4.128	9.80392	50.8024
BY	1	31.8852	5.44	4.78873	88.2353	4.028	11.7647	46.1214
BY	2	31.9499	5.35253	4.22656	88.6139	4.321	11.3861	47.0849
BY	3	32.1469	5.38722	5.19949	88.5714	4.118	11.4286	45.8378
MBY	1	30.3852	7.03635	3.98936	89.5238	4.019	10.4762	48.1129
MBY	2	30.2268	6.70588	4.16145	89.4737	4.087	10.5263	48.3796
MBY	3	30.0399	7.12773	5.07182	88.7255	4.212	11.2745	46.4861
SBY	1	31.1728	9.17757	3.89775	91.1628	3.832	8.83721	46.9147
SBY	2	31.7255	9.61098	4.3821	90.4762	3.982	9.52381	44.7576
SBY	3	31.2737	9.64607	4.74366	90.8654	3.803	9.13462	45.2019
MCYMo	1	19.6789	3.45448	4.35264	80.4109	3.419	19.5891	52.9249
MCYMo	2	18.4764	3.39684	3.63947	82.4296	3.362	17.5704	56.9169
MCYMo	3	19.1477	3.39725	4.95028	80.8035	3.532	19.1965	53.3083
MBYMo	1	21.5475	3.40941	3.65294	82.1256	3.645	17.8744	53.5158
MBYMo	2	21.6607	2.88958	4.29825	81.4286	3.735	18.5714	52.58
MBYMo	3	23.7426	3.38526	4.28235	81.7308	3.555	18.2692	50.3206
SBYMo	1	21.9555	4.87013	4.92857	81.1594	3.203	18.8406	49.4052
SBYMo	2	21.6254	5.36143	4.31595	81.0945	3.369	18.9055	49.7918
SBYMo	3	21.4862	5.29599	4.89157	81.7734	3.298	18.2266	50.0996
BYMo	1	21.9277	4.49441	5.61801	80.0995	3.542	19.9005	48.0594
BYMo	2	21.4484	3.42077	6.18182	80.8824	3.622	19.1177	49.8313
BYMo	3	23.0557	3.92861	5.59091	80.4878	3.511	19.5122	47.9126
MCW	1	27.5924	7.22135	3.41209	87.9227	3.643	12.0773	49.6968
MCW	2	27.2563	5.8181	2.85311	87.6238	3.657	12.3762	51.6962
MCW	3	27.2961	6.32738	2.83602	88.1517	3.688	11.8483	51.6921
BW	1	29.9084	6.24462	4.51397	88.6139	3.457	11.3861	47.9469
BW	2	30.3641	6.1875	3.96	88.3838	3.478	11.6162	47.8722
BW	3	30.7308	6.715	3.96409	88.2927	3.398	11.7073	46.8828
MBW	1	29.2969	7.19399	3.42614	87.5622	3.774	12.4378	47.6452
MBW	2	28.518	6.80742	4.00276	87.4396	3.801	12.5604	48.1115
MBW	3	28.8662	6.34809	3.98342	87.8641	3.744	12.1359	48.6664
SBW	1	29.2487	9.66633	3.90608	89.604	3.846	10.396	46.7828
SBW	2	30.0221	12.9753	3.35567	89.4009	3.801	10.5991	43.0479
SBW	3	29.0279	12.7566	3.89516	89.8551	3.911	10.1449	44.1755
** CP = Crude protein, CF = Crude fat, DDM = Dry matter, TCARB0 = Total carbohydrates, Energy = Net energy**
