# Supplementary material for: Effects of waste stream combinations from brewing industry on performance of Black Soldier Fly, Hermetia illucens (Diptera: Stratiomyidae)
Source: PeerJ. 2018 Nov 28;6:e5885. doi: 10.7717/peerj.5885 (PMC6272031; doi:10.7717/peerj.5885)
Supplement: Supplemental Information 4 [file peerj-06-5885-s004.xlsx]

## Sheet: Sheet1
RAW DATA_Percent survival of Hermetia illucens stages (larva, pre-pupa and pupa)
Larval diet	replicate	larva	Pre-pupa	pupa
MCW	1	100	96	96
MCW	2	100	93	88
MCW	3	92	81	65
MCW	4	61	61	63
MCW	5	91	68	64
MBW	1	96	90	80
MBW	2	100	94	93
MBW	3	98	89	87
MBW	4	88	88	75
MBW	5	97	86	85
SBW	1	76	61	59
SBW	2	82	80	80
SBW	3	95	62	60
SBW	4	94	84	81
SBW	5	81	67	61
BW	1	100	100	88
BW	2	96	81	81
BW	3	100	98	94
BW	4	100	100	98
BW	5	100	98	93
MCY	1	98	89	80
MCY	2	94	94	83
MCY	3	95	83	64
MCY	4	99	83	81
MCY	5	94	84	76
MBY	1	85	65	61
MBY	2	80	77	76
MBY	3	86	81	81
MBY	4	100	68	64
MBY	5	99	62	62
SBY	1	92	74	67
SBY	2	79	78	78
SBY	3	94	91	91
SBY	4	92	89	84
SBY	5	91	89	86
BY	1	99	92	91
BY	2	99	99	90
BY	3	98	98	77
BY	4	93	93	86
BY	5	99	67	62
MCYMo	1	98	94	75
MCYMo	2	98	96	95
MCYMo	3	88	72	63
MCYMo	4	99	75	56
MCYMo	5	99	78	71
MBYMo	1	99	83	79
MBYMo	2	96	74	74
MBYMo	3	99	72	64
MBYMo	4	96	63	50
MBYMo	5	98	95	94
SBYMo	1	90	90	88
SBYMo	2	84	82	88
SBYMo	3	96	91	90
SBYMo	4	94	91	90
SBYMo	5	86	85	77
BYMo	1	85	66	65
BYMo	2	91	63	60
BYMo	3	86	69	67
BYMo	4	93	74	51
BYMo	5	97	86	84
