# Supplementary material for: Effects of waste stream combinations from brewing industry on performance of Black Soldier Fly, Hermetia illucens (Diptera: Stratiomyidae)
Source: PeerJ. 2018 Nov 28;6:e5885. doi: 10.7717/peerj.5885 (PMC6272031; doi:10.7717/peerj.5885)
Supplement: Supplemental Information 6 [file peerj-06-5885-s006.xlsx]

## Sheet: Sheet1
RAW DATA_Number of eggs laid by female Hermetia illucens when provided with sugar solution or plain water
Larval diet	Condition	replicate	eggs
MCW	Water	1	247
MCW	Water	2	257
MCW	Water	3	470
MBW	Water	1	599
MBW	Water	2	485
MBW	Water	3	215
MBW	Water	4	351
MBW	Water	5	480
SBW	Water	1	544
SBW	Water	2	569
SBW	Water	3	900
SBW	Water	4	544
BW	Water	1	517
BW	Water	2	779
BW	Water	3	419
BW	Water	4	470
BW	Water	5	648
MCY	Water	1	382
MCY	Water	2	709
MCY	Water	3	420
MCY	Water	4	328
MCY	Water	5	680
MBY	Water	1	548
MBY	Water	2	1110
MBY	Water	3	800
MBY	Water	4	608
MBY	Water	5	870
SBY	Water	1	759
SBY	Water	2	938
BY	Water	1	663
BY	Water	2	1109
BY	Water	3	582
BY	Water	4	743
BY	Water	5	598
MCYMo	Water	1	562
MCYMo	Water	2	691
MCYMo	Water	3	890
MCYMo	Water	4	542
MCYMo	Water	5	359
MBYMo	Water	1	540
MBYMo	Water	2	1008
MBYMo	Water	3	673
MBYMo	Water	4	429
MBYMo	Water	5	550
SBYMo	Water	1	547
SBYMo	Water	2	284
SBYMo	Water	3	242
SBYMo	Water	4	700
SBYMo	Water	5	518
BYMo	Water	1	820
BYMo	Water	2	689
MCW	Sugar	1	693
MCW	Sugar	2	300
MCW	Sugar	3	269
MBW	Sugar	1	769
MBW	Sugar	2	341
MBW	Sugar	3	353
MBW	Sugar	4	696
MBW	Sugar	5	590
MBW	Sugar	6	350
MBW	Sugar	7	719
MBW	Sugar	8	393
SBW	Sugar	1	400
BW	Sugar	1	688
BW	Sugar	2	390
MCY	Sugar	1	783
MCY	Sugar	2	740
MCY	Sugar	3	799
MBY	Sugar	1	415
MBY	Sugar	2	410
MBY	Sugar	3	468
MBY	Sugar	4	1533
BY	Sugar	1	719
BY	Sugar	2	447
MCYMo	Sugar	1	734
MCYMo	Sugar	2	675
MCYMo	Sugar	3	281
MCYMo	Sugar	4	209
MCYMo	Sugar	5	284
SBYMo	Sugar	1	453
SBYMo	Sugar	2	560
SBYMo	Sugar	3	218
BYMo	Sugar	1	782
BYMo	Sugar	2	503
MBYMo	Sugar	1	320
MBYMo	Sugar	2	525
MBYMo	Sugar	3	569
MBYMo	Sugar	4	599
MBYMo	Sugar	5	520
