# Supplementary material for: Effects of waste stream combinations from brewing industry on performance of Black Soldier Fly, Hermetia illucens (Diptera: Stratiomyidae)
Source: PeerJ. 2018 Nov 28;6:e5885. doi: 10.7717/peerj.5885 (PMC6272031; doi:10.7717/peerj.5885)
Supplement: Supplemental Information 7 [file peerj-06-5885-s007.xlsx]

## Sheet: Sheet1
RAW DATA_Pre-oviposition time for water- and sugar-fed female Hermetia illucens.
Water-fed:
Larval diet	Replicate	days
MCW	1	7
MCW	2	13
MCW	3	13
MBW	1	7
MBW	2	8
MBW	3	11
MBW	4	11
MBW	5	11
SBW	1	5
SBW	2	8
SBW	3	8
SBW	4	8
BW	1	6
BW	2	9
BW	3	9
BW	4	9
BW	5	13
MCY	1	6
MCY	2	8
MCY	3	8
MCY	4	8
MCY	5	9
MBY	1	6
MBY	2	6
MBY	3	7
MBY	4	15
MBY	5	17
BY	1	5
BY	2	9
BY	3	9
BY	4	8
BY	5	10
MCYMo	1	8
MCYMo	2	8
MCYMo	3	8
MCYMo	4	8
MCYMo	5	10
MBYMo	1	6
MBYMo	2	6
MBYMo	3	8
MBYMo	4	8
MBYMo	5	12
SBYMo	1	6
SBYMo	2	8
SBYMo	3	7
SBYMo	4	7
SBYMo	5	7
BYMo	1	7
BYMo	2	8
BYMo	3	8
BYMo	3	7
Sugar-fed:
Larval diet	Replicate	days
MCW	1	13
MCW	2	9
MCW	3	8
MBW	1	8
MBW	2	10
MBW	3	10
MBW	4	9
MBW	5	9
MBW	6	7
MBW	7	7
MBW	8	10
SBW	1	8
BW	1	10
BW	2	9
MCY	1	9
MCY	2	8
MCY	3	10
MBY	1	10
MBY	2	10
MBY	3	10
MBY	4	9
BY	1	10
BY	2	17
MCYMo	1	9
MCYMo	2	7
MCYMo	3	11
MCYMo	4	11
MCYMo	5	13
MBYMo	1	10
MBYMo	2	8
MBYMo	3	8
MBYMo	4	14
MBYMo	5	11
SBYMo	1	7
SBYMo	2	7
SBYMo	3	18
BYMo	1	10
BYMo	2	10
BYMo	1	11
BYMo	2	11
